# Supplementary material
Source: Royal Society of Chemistry journal article supplement (doi:10.1039/d6cp01064d)
Supplement: d6cp01064d1.pdf [file d6cp01064d1.pdf]

## Supporting Information

### Computational Insights into the Hydroxylation Mechanism of Toluene Catalyzed by Non-Heme Diiron Toluene 4-Monooxygenase T4moH

Zheng Liang<sup>§</sup>, Yue Wang<sup>§</sup> and Yongjun Liu<sup>\*</sup>

*School of Chemistry and Chemical Engineering, Shandong University, Jinan, Shandong 250100, China*

(<sup>§</sup>These authors contributed equally to this work. <sup>\*</sup>Corresponding Author: Email address: [yongjunliu\\_1@sdu.edu.cn](mailto:yongjunliu_1@sdu.edu.cn))

#### Table of Contents

1. Table S1 Calculated Mulliken spin population of key atoms in the  $R_I$  and  $R_{II}$  at nonet spin states.
2. Table S2 Calculated Mulliken spin population of key atoms and groups in transition states and intermediates in T4moH-catalysed hydroxylation reactions at nonet spin states.
3. Figure S1 (a) Crystal structure of T4moH (PDB ID: 5TDS); (b) Overlap of chain A (gold) and chain D (blue) in the T4moH-toluene complex.
4. Figure S2 (a) Constructed T4moH-toluene complex solvation model. (b) RMSDs of 50 ns MD simulations for the backbone atoms of T4moH. (c) RMSFs of the system derived from the 50ns MD simulations
5. Figure S3. Two conformations of residue Glu104 in the crystal structure of T4moH (PDB ID 4P1B).
6. Figure S4. Comparison of potential energies for the Fe<sup>III</sup>-O-O-• species of  $^9R_I$  and  $^{os}R_I$  for the nucleophilic attack.
7. Cartesian coordinates of QM regions of optimized species.

Table S1 Calculated Mulliken spin population of key atoms in the R<sub>I</sub> and R<sub>II</sub> at nonet spin states

|                                                            | <b>Fe1</b> | <b>Fe2</b> | <b>Op</b>  | <b>Od</b>  |
|------------------------------------------------------------|------------|------------|------------|------------|
| <sup>11</sup> R/ <sup>0S</sup> R <sub>I</sub>              | 3.72/-3.61 | 3.73/3.91  | 0.94/-0.14 | 0.99/-0.34 |
| <sup>9</sup> R <sub>I</sub> / <sup>9</sup> R <sub>II</sub> | 4.19/2.82  | 3.69/4.02  | -0.10/0.32 | -0.53/0.08 |
| <sup>7</sup> R <sub>I</sub> / <sup>7</sup> R <sub>II</sub> | 1.04/1.03  | 3.71/4.05  | 0.37/0.17  | 0.61/0.15  |
| <sup>5</sup> R <sub>I</sub> / <sup>5</sup> R <sub>II</sub> | 1.05/-1.02 | 1.91/4.05  | 0.35/0.21  | 0.60/0.18  |
| <sup>3</sup> R <sub>I</sub> / <sup>3</sup> R <sub>II</sub> | -1.0/-1.03 | 1.92/2.85  | 0.36/0.05  | 0.65/-1.11 |

Table S2 Calculated Mulliken spin population of key atoms and groups in transition states and intermediates in T4moH-catalysed hydroxylation reactions at nonet spin states

|                                                                   | <b>Fe1</b> | <b>Fe2</b> | <b>Op</b>  | <b>Od</b>   | <b>MBN</b>  |
|-------------------------------------------------------------------|------------|------------|------------|-------------|-------------|
| <sup>9</sup> TS1 <sub>I</sub> / <sup>9</sup> IM1 <sub>I-a</sub>   | 4.18/4.17  | 3.71/3.72  | 0.21/0.19  | -0.26/-0.03 | -0.68/-0.82 |
| <sup>9</sup> TS2 <sub>I</sub> / <sup>9</sup> IM2 <sub>I</sub>     | 4.22/4.21  | 3.67/2.82  | -0.10/0.37 | -0.26/0.00  | —           |
| <sup>9</sup> TS3 <sub>I</sub> / <sup>9</sup> IM3 <sub>I</sub>     | 4.19/4.20  | 2.94/2.85  | 0.22/0.33  | 0.02/0.08   | —           |
| <sup>9</sup> IM4 <sub>I</sub> / <sup>9</sup> TS5 <sub>I</sub>     | 4.13/4.18  | 2.91/2.83  | 0.37/0.35  | 0.03/0.07   | —           |
| <sup>9</sup> IM1 <sub>I-b</sub> / <sup>9</sup> IM1 <sub>I-c</sub> | 4.01/3.29  | 3.65/3.66  | 0.22/-0.01 | -0.02/-0.01 | -0.73/0.71  |
| <sup>9</sup> P <sub>I</sub> / <sup>9</sup> TS1 <sub>II</sub>      | 4.12/2.77  | 3.02/4.09  | 0.26/0.27  | 0.01/0.33   | —           |
| <sup>9</sup> IM1 <sub>II</sub> / <sup>9</sup> IM1 <sub>II</sub> ' | 2.82/3.14  | 4.04/3.18  | 0.03/0.58  | 0.40/0.57   | —           |

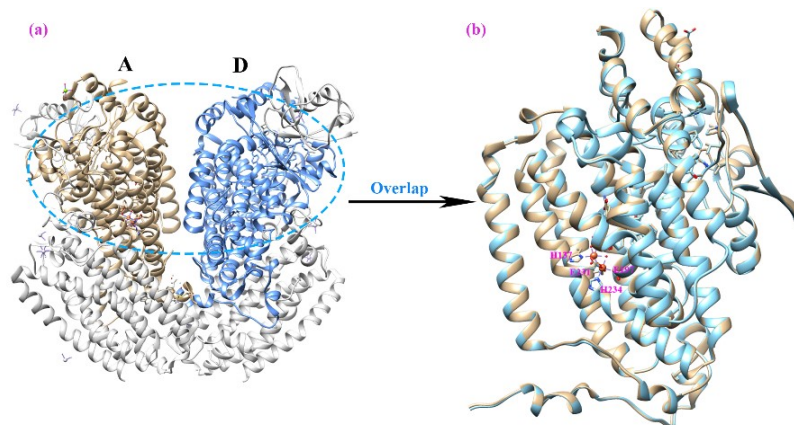

Figure S1 (a) Crystal structure of T4moH (PDB ID: 5TDS); (b) Overlap of chain A (gold) and chain D (blue) in the T4moH-toluene complex.

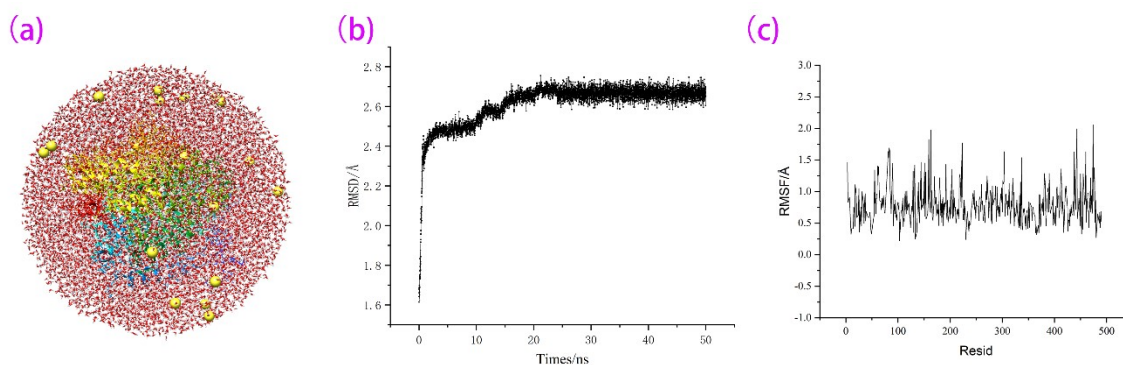

Figure S2 (a) Constructed T4moH-toluene complex solvation model. (b) RMSDs of 50 ns MD simulations for the backbone atoms of T4moH. (c) RMSFs of the system derived from the 50 ns MD simulations.

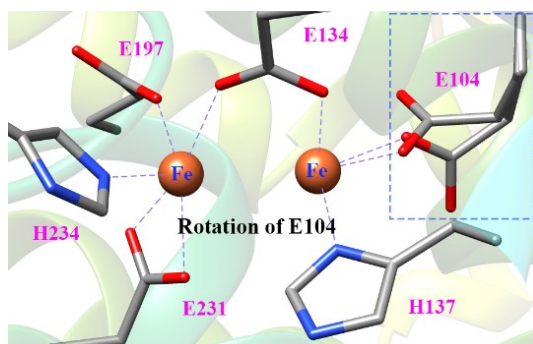

Figure S3. Two conformations of residue Glu104 in the crystal structure of T4moH (PDB ID 4P1B).

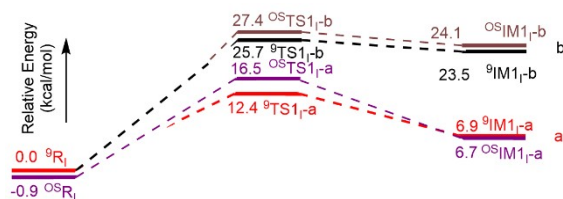

Figure S4. Comparison of potential energy profiles for the nucleophilic attack of FeI<sup>III</sup>-Op-Od<sup>-</sup> on C4 of toluene using <sup>9</sup>R<sub>I</sub> and <sup>os</sup>R<sub>I</sub> as reactants.

#### Cartesian coordinates of QM regions of optimized species

|                 |        |         |       |   |                      |
|-----------------|--------|---------|-------|---|----------------------|
| <sup>os</sup> R |        |         |       |   |                      |
| C               | -5.430 | -6.986  | 5.799 | C | -7.948 -12.677 3.101 |
| H               | -5.034 | -7.599  | 6.617 | H | -7.721 -13.600 3.611 |
| H               | -6.413 | -7.372  | 5.517 | C | -9.203 -3.016 -3.267 |
| C               | -4.487 | -7.061  | 4.582 | H | 10.075 -2.545 -3.731 |
| H               | -4.326 | -6.084  | 4.104 | H | -9.330 -4.102 -3.306 |
| H               | -3.498 | -7.430  | 4.862 | C | -9.082 -2.573 -1.795 |
| C               | -5.037 | -7.939  | 3.465 | H | -8.099 -2.798 -1.377 |
| O               | -6.298 | -7.870  | 3.263 | H | -9.264 -1.497 -1.684 |
| O               | -4.226 | -8.634  | 2.797 | C | 10.133 -3.326 -0.995 |
| C               | 10.263 | -7.120  | 5.548 | O | 11.339 -3.150 -1.207 |
| H               | 10.991 | -6.740  | 6.274 | O | -9.659 -4.158 -0.112 |
| H               | -9.274 | -6.780  | 5.867 | C | -9.447 -8.958 -4.285 |
| C               | 10.622 | -6.528  | 4.167 | H | -8.619 -9.553 -3.888 |
| H               | 11.654 | -6.781  | 3.887 | H | -9.549 -9.245 -5.334 |
| H               | 10.628 | -5.437  | 4.262 | C | -9.085 -7.457 -4.153 |
| C               | -9.790 | -6.848  | 2.916 | H | -8.286 -7.243 -4.872 |
| O               | -9.223 | -7.957  | 2.760 | H | -9.925 -6.803 -4.390 |
| O               | -9.805 | -5.932  | 2.020 | C | -8.544 -7.162 -2.751 |
| C               | -6.634 | -10.792 | 4.360 | O | -7.501 -7.757 -2.402 |
| H               | -7.041 | -9.830  | 4.682 | O | -9.235 -6.394 -1.983 |
| H               | -5.617 | -10.613 | 3.995 | C | 14.948 -6.504 -0.106 |
| N               | -8.793 | -12.645 | 2.025 | H | 15.010 -5.507 0.337  |
| H               | -9.296 | -13.461 | 1.604 | H | 15.598 -7.174 0.468  |
| C               | -7.514 | -11.383 | 3.296 | N | 13.151 -8.312 0.111  |
| C               | -8.848 | -11.379 | 1.584 | H | 13.771 -9.118 0.335  |
| H               | -9.440 | -11.069 | 0.738 | C | 13.540 -6.993 -0.082 |
| N               | -8.077 | -10.588 | 2.320 | C | 11.800 -8.351 0.091  |
|                 |        |         |       | H | 11.218 -9.249 0.222  |

|                  |        |         |        |   |        |         |        |
|------------------|--------|---------|--------|---|--------|---------|--------|
| N                | 11.306 | -7.135  | -0.114 | H | -9.307 | -6.767  | 5.938  |
| C                | 12.383 | -6.283  | -0.230 | C | 10.671 | -6.501  | 4.256  |
| H                | 12.252 | -5.223  | -0.388 | H | 11.701 | -6.763  | 3.977  |
| Fe               | -7.482 | -8.603  | 1.720  | H | 10.691 | -5.411  | 4.372  |
| Fe               | -9.495 | -6.077  | -0.014 | C | -9.846 | -6.760  | 2.984  |
| C                | -3.331 | -3.077  | 2.992  | O | -9.129 | -7.807  | 2.867  |
| C                | -4.645 | -2.601  | 3.099  | O | 10.012 | -5.903  | 2.073  |
| C                | -5.568 | -2.809  | 2.070  | C | -6.694 | -10.747 | 4.363  |
| C                | -5.188 | -3.495  | 0.914  | H | -7.099 | -9.801  | 4.728  |
| C                | -3.883 | -3.983  | 0.801  | H | -5.683 | -10.555 | 3.993  |
| C                | -2.966 | -3.776  | 1.831  | N | -8.873 | -12.534 | 1.986  |
| C                | -2.333 | -2.854  | 4.100  | H | -9.362 | -13.357 | 1.563  |
| H                | -2.299 | -3.712  | 4.785  | C | -7.582 | -11.297 | 3.281  |
| H                | -2.581 | -1.970  | 4.695  | C | -8.902 | -11.264 | 1.548  |
| H                | -1.315 | -2.733  | 3.718  | H | -9.477 | -10.940 | 0.697  |
| H                | -4.942 | -2.044  | 3.984  | N | -8.123 | -10.485 | 2.296  |
| H                | -6.580 | -2.425  | 2.169  | C | -8.039 | -12.579 | 3.072  |
| H                | -5.890 | -3.645  | 0.100  | H | -7.836 | -13.507 | 3.583  |
| H                | -3.578 | -4.506  | -0.099 | C | -9.214 | -2.996  | -3.266 |
| H                | -1.948 | -4.143  | 1.726  | H | 10.082 | -2.525  | -3.739 |
| O                | -7.601 | -6.636  | 0.625  | H | -9.347 | -4.082  | -3.289 |
| O                | -6.650 | -6.102  | -0.034 | C | -9.090 | -2.532  | -1.800 |
| O                | -8.328 | -9.203  | -0.338 | H | -8.099 | -2.735  | -1.386 |
| H                | -7.925 | -8.607  | -1.027 | H | -9.288 | -1.458  | -1.702 |
| H                | -7.976 | -10.076 | -0.567 | C | 10.117 | -3.298  | -0.980 |
| O                | -4.701 | -8.818  | -1.529 | O | 11.332 | -3.131  | -1.178 |
| H                | -3.774 | -9.094  | -1.601 | O | -9.622 | -4.124  | -0.115 |
| H                | -5.102 | -9.021  | -2.399 | C | -9.447 | -8.990  | -4.317 |
| O                | -5.745 | -9.081  | 0.837  | H | -8.626 | -9.583  | -3.904 |
| H                | -5.010 | -8.959  | 1.529  | H | -9.556 | -9.306  | -5.357 |
| H                | -5.399 | -8.949  | -0.085 | C | -9.068 | -7.493  | -4.222 |
|                  |        |         |        | H | -8.216 | -7.323  | -4.891 |
|                  |        |         |        | H | -9.875 | -6.835  | -4.549 |
| <sup>9</sup> R-B |        |         |        | C | -8.645 | -7.141  | -2.790 |
| C                | -5.475 | -6.937  | 5.751  | O | -7.675 | -7.805  | -2.315 |
| H                | -5.064 | -7.587  | 6.531  | O | -9.336 | -6.299  | -2.144 |
| H                | -6.468 | -7.304  | 5.478  | C | 14.947 | -6.502  | -0.117 |
| C                | -4.562 | -6.955  | 4.511  | H | 14.980 | -5.502  | 0.325  |
| H                | -4.570 | -5.996  | 3.972  | H | 15.607 | -7.154  | 0.467  |
| H                | -3.522 | -7.167  | 4.767  | N | 13.194 | -8.351  | 0.086  |
| C                | -5.029 | -7.959  | 3.476  | H | 13.822 | -9.145  | 0.324  |
| O                | -6.312 | -8.005  | 3.300  | C | 13.553 | -7.026  | -0.110 |
| O                | -4.206 | -8.648  | 2.838  | C | 11.843 | -8.420  | 0.038  |
| C                | 10.292 | -7.114  | 5.616  | H | 11.286 | -9.334  | 0.167  |
| H                | 11.023 | -6.769  | 6.355  |   |        |         |        |

|                    |         |        |        |   |         |         |        |
|--------------------|---------|--------|--------|---|---------|---------|--------|
| N                  | 11.321  | -7.222 | -0.188 | H | -9.392  | -6.719  | 6.048  |
| C                  | 12.381  | -6.348 | -0.292 | C | -10.698 | -6.449  | 4.328  |
| H                  | 12.232  | -5.290 | -0.463 | H | -11.706 | -6.725  | 3.993  |
| Fe                 | -7.501  | -8.435 | 1.789  | H | -10.740 | -5.361  | 4.456  |
| Fe                 | -9.556  | -6.063 | -0.040 | C | -9.792  | -6.679  | 3.108  |
| C                  | -3.281  | -3.136 | 2.881  | O | -8.875  | -7.568  | 3.190  |
| C                  | -4.646  | -2.812 | 2.912  | O | -10.043 | -5.969  | 2.107  |
| C                  | -5.473  | -3.091 | 1.821  | C | -6.773  | -10.642 | 4.418  |
| C                  | -4.948  | -3.697 | 0.676  | H | -7.200  | -9.730  | 4.845  |
| C                  | -3.591  | -4.026 | 0.636  | H | -5.773  | -10.409 | 4.042  |
| C                  | -2.769  | -3.747 | 1.728  | N | -8.879  | -12.358 | 1.919  |
| C                  | -2.387  | -2.850 | 4.062  | H | -9.353  | -13.173 | 1.482  |
| H                  | -2.364  | -3.699 | 4.758  | C | -7.654  | -11.160 | 3.314  |
| H                  | -2.726  | -1.974 | 4.624  | C | -8.873  | -11.072 | 1.506  |
| H                  | -1.349  | -2.682 | 3.759  | H | -9.283  | -10.723 | 0.570  |
| H                  | -5.058  | -2.316 | 3.789  | N | -8.141  | -10.318 | 2.326  |
| H                  | -6.529  | -2.838 | 1.867  | C | -8.108  | -12.433 | 3.053  |
| H                  | -5.578  | -3.898 | -0.184 | H | -7.947  | -13.373 | 3.557  |
| H                  | -3.171  | -4.483 | -0.255 | C | -9.154  | -3.100  | -3.253 |
| H                  | -1.710  | -3.984 | 1.674  | H | -10.014 | -2.508  | -3.582 |
| O                  | -7.604  | -6.699 | 0.627  | H | -9.359  | -4.157  | -3.449 |
| O                  | -7.095  | -5.796 | 1.410  | C | -8.925  | -2.943  | -1.741 |
| O                  | -8.329  | -9.046 | -0.192 | H | -8.004  | -3.436  | -1.421 |
| H                  | -8.021  | -8.455 | -0.970 | H | -8.859  | -1.885  | -1.453 |
| H                  | -7.948  | -9.908 | -0.414 | C | -10.104 | -3.546  | -0.990 |
| O                  | -4.716  | -8.802 | -1.394 | O | -11.254 | -3.135  | -1.199 |
| H                  | -3.790  | -9.074 | -1.491 | O | -9.838  | -4.465  | -0.104 |
| H                  | -5.134  | -8.975 | -2.266 | C | -9.458  | -8.979  | -4.329 |
| O                  | -5.805  | -9.069 | 0.904  | H | -8.634  | -9.578  | -3.932 |
| H                  | -5.049  | -9.017 | 1.567  | H | -9.569  | -9.271  | -5.376 |
| H                  | -5.448  | -8.943 | -0.028 | C | -9.078  | -7.483  | -4.217 |
| <sup>9</sup> TS1-B |         |        |        | H | -8.290  | -7.287  | -4.953 |
| C                  | -5.346  | -7.036 | 5.851  | H | -9.918  | -6.827  | -4.453 |
| H                  | -4.892  | -7.587 | 6.682  | C | -8.502  | -7.151  | -2.830 |
| H                  | -6.317  | -7.482 | 5.627  | O | -7.422  | -7.666  | -2.500 |
| C                  | -4.426  | -7.122 | 4.609  | O | -9.225  | -6.384  | -2.077 |
| H                  | -4.208  | -6.140 | 4.163  | C | -14.891 | -6.532  | -0.110 |
| H                  | -3.458  | -7.563 | 4.856  | H | -14.948 | -5.542  | 0.352  |
| C                  | -5.030  | -7.923 | 3.470  | H | -15.520 | -7.216  | 0.472  |
| O                  | -6.313  | -7.738 | 3.321  | N | -13.076 | -8.329  | 0.029  |
| O                  | -4.326  | -8.666 | 2.762  | H | -13.688 | -9.138  | 0.250  |
| C                  | -10.358 | -7.081 | 5.687  | C | -13.480 | -7.009  | -0.127 |
| H                  | -11.124 | -6.774 | 6.408  | C | -11.724 | -8.355  | -0.021 |
|                    |         |        |        | H | -11.125 | -9.249  | 0.044  |

|                |         |         |        |   |        |         |        |
|----------------|---------|---------|--------|---|--------|---------|--------|
| N              | -11.250 | -7.126  | -0.202 | H | -9.305 | -6.791  | 5.879  |
| C              | -12.332 | -6.283  | -0.280 | C | 10.625 | -6.609  | 4.144  |
| H              | -12.211 | -5.221  | -0.415 | H | 11.628 | -6.930  | 3.831  |
| Fe             | -7.528  | -8.188  | 1.942  | H | 10.694 | -5.520  | 4.216  |
| Fe             | -9.316  | -6.328  | -0.058 | C | -9.721 | -6.880  | 2.930  |
| C              | -3.366  | -3.185  | 3.025  | O | -9.247 | -8.053  | 2.730  |
| C              | -4.725  | -2.888  | 3.207  | O | -9.580 | -5.914  | 2.140  |
| C              | -5.674  | -3.267  | 2.255  | C | -6.641 | -10.769 | 4.376  |
| C              | -5.278  | -3.943  | 1.096  | H | -7.063 | -9.822  | 4.719  |
| C              | -3.926  | -4.235  | 0.900  | H | -5.625 | -10.576 | 4.020  |
| C              | -2.981  | -3.860  | 1.857  | N | -8.835 | -12.602 | 2.057  |
| C              | -2.340  | -2.808  | 4.065  | H | -9.330 | -13.420 | 1.630  |
| H              | -2.218  | -3.602  | 4.812  | C | -7.518 | -11.344 | 3.303  |
| H              | -2.622  | -1.896  | 4.601  | C | -8.911 | -11.331 | 1.633  |
| H              | -1.351  | -2.658  | 3.624  | H | -9.552 | -11.018 | 0.827  |
| H              | -5.039  | -2.340  | 4.093  | N | -8.109 | -10.542 | 2.347  |
| H              | -6.722  | -3.027  | 2.413  | C | -7.953 | -12.638 | 3.102  |
| H              | -6.010  | -4.236  | 0.350  | H | -7.707 | -13.562 | 3.601  |
| H              | -3.605  | -4.740  | -0.005 | C | -9.195 | -3.015  | -3.265 |
| H              | -1.930  | -4.080  | 1.688  | H | 10.065 | -2.521  | -3.709 |
| O              | -7.628  | -6.275  | 0.573  | H | -9.339 | -4.099  | -3.315 |
| O              | -8.593  | -7.936  | 0.409  | C | -9.040 | -2.602  | -1.791 |
| O              | -8.745  | -9.961  | -1.178 | H | -8.067 | -2.889  | -1.385 |
| H              | -8.144  | -9.209  | -1.301 | H | -9.153 | -1.518  | -1.664 |
| H              | -8.390  | -10.692 | -1.723 | C | 10.126 | -3.287  | -0.976 |
| O              | -4.837  | -8.763  | -1.344 | O | 11.322 | -3.068  | -1.222 |
| H              | -3.922  | -9.081  | -1.356 | O | -9.711 | -4.086  | -0.043 |
| H              | -5.182  | -8.922  | -2.248 | C | -9.444 | -8.980  | -4.307 |
| O              | -6.063  | -8.842  | 0.902  | H | -8.640 | -9.617  | -3.928 |
| H              | -5.257  | -8.902  | 1.497  | H | -9.565 | -9.233  | -5.363 |
| H              | -5.764  | -8.696  | -0.048 | C | -9.025 | -7.502  | -4.131 |
|                |         |         |        | H | -8.160 | -7.315  | -4.780 |
| <sup>7</sup> R |         |         |        | H | -9.806 | -6.802  | -4.436 |
| C              | -5.613  | -6.865  | 5.643  | C | -8.617 | -7.218  | -2.679 |
| H              | -5.139  | -7.566  | 6.339  | O | -7.821 | -8.064  | -2.154 |
| H              | -6.639  | -7.198  | 5.460  | O | -9.133 | -6.246  | -2.067 |
| C              | -4.852  | -6.832  | 4.305  | C | 14.888 | -6.497  | -0.116 |
| H              | -5.009  | -5.888  | 3.766  | H | 14.951 | -5.497  | 0.322  |
| H              | -3.776  | -6.960  | 4.444  | H | 15.524 | -7.166  | 0.476  |
| C              | -5.352  | -7.912  | 3.359  | N | 13.091 | -8.296  | 0.096  |
| O              | -6.633  | -7.911  | 3.173  | H | 13.712 | -9.098  | 0.309  |
| O              | -4.544  | -8.708  | 2.827  | C | 13.476 | -6.977  | -0.101 |
| C              | 10.280  | -7.156  | 5.545  | C | 11.736 | -8.326  | 0.096  |
| H              | 11.032  | -6.783  | 6.250  | H | 11.155 | -9.223  | 0.234  |

|                |         |         |        |   |         |         |        |
|----------------|---------|---------|--------|---|---------|---------|--------|
| N              | 11.233  | -7.112  | -0.097 | H | -9.307  | -6.788  | 5.862  |
| C              | 12.314  | -6.267  | -0.229 | C | -10.626 | -6.619  | 4.122  |
| H              | 12.186  | -5.205  | -0.378 | H | -11.626 | -6.948  | 3.810  |
| Fe             | -7.653  | -8.612  | 1.686  | H | -10.698 | -5.530  | 4.187  |
| Fe             | -9.356  | -5.994  | 0.035  | C | -9.709  | -6.899  | 2.920  |
| C              | -3.314  | -3.099  | 2.944  | O | -9.307  | -8.089  | 2.682  |
| C              | -4.650  | -2.681  | 3.025  | O | -9.476  | -5.919  | 2.166  |
| C              | -5.542  | -2.926  | 1.976  | C | -6.614  | -10.790 | 4.368  |
| C              | -5.109  | -3.588  | 0.825  | H | -7.024  | -9.834  | 4.698  |
| C              | -3.781  | -4.013  | 0.736  | H | -5.594  | -10.613 | 4.014  |
| C              | -2.894  | -3.770  | 1.786  | N | -8.845  | -12.616 | 2.082  |
| C              | -2.351  | -2.846  | 4.078  | H | -9.340  | -13.432 | 1.651  |
| H              | -2.319  | -3.697  | 4.771  | C | -7.498  | -11.365 | 3.302  |
| H              | -2.632  | -1.961  | 4.657  | C | -8.938  | -11.343 | 1.672  |
| H              | -1.326  | -2.709  | 3.722  | H | -9.603  | -11.024 | 0.888  |
| H              | -4.989  | -2.140  | 3.906  | N | -8.117  | -10.558 | 2.368  |
| H              | -6.573  | -2.588  | 2.056  | C | -7.935  | -12.658 | 3.104  |
| H              | -5.789  | -3.776  | 0.001  | H | -7.677  | -13.585 | 3.592  |
| H              | -3.436  | -4.521  | -0.160 | C | -9.190  | -3.025  | -3.258 |
| H              | -1.859  | -4.088  | 1.698  | H | -10.063 | -2.528  | -3.695 |
| O              | -7.566  | -6.952  | 0.754  | H | -9.333  | -4.109  | -3.316 |
| O              | -6.406  | -6.371  | 0.612  | C | -9.031  | -2.625  | -1.780 |
| O              | -8.515  | -9.166  | -0.049 | H | -8.060  | -2.923  | -1.378 |
| H              | -8.206  | -8.577  | -0.864 | H | -9.135  | -1.541  | -1.646 |
| H              | -8.122  | -10.024 | -0.276 | C | -10.124 | -3.304  | -0.968 |
| O              | -4.724  | -8.672  | -1.150 | O | -11.317 | -3.070  | -1.214 |
| H              | -3.797  | -8.951  | -1.182 | O | -9.721  | -4.108  | -0.034 |
| H              | -5.096  | -8.919  | -2.028 | C | -9.444  | -8.977  | -4.301 |
| O              | -6.049  | -9.302  | 0.941  | H | -8.641  | -9.617  | -3.925 |
| H              | -5.339  | -9.210  | 1.675  | H | -9.565  | -9.221  | -5.359 |
| H              | -5.621  | -8.959  | 0.090  | C | -9.024  | -7.501  | -4.111 |
|                |         |         |        | H | -8.168  | -7.302  | -4.768 |
| <sup>5</sup> R |         |         |        | H | -9.808  | -6.797  | -4.396 |
| C              | -5.636  | -6.844  | 5.629  | C | -8.595  | -7.236  | -2.661 |
| H              | -5.144  | -7.552  | 6.305  | O | -7.809  | -8.096  | -2.148 |
| H              | -6.665  | -7.179  | 5.465  | O | -9.084  | -6.256  | -2.038 |
| C              | -4.910  | -6.788  | 4.275  | C | -14.887 | -6.494  | -0.116 |
| H              | -5.117  | -5.854  | 3.736  | H | -14.957 | -5.494  | 0.323  |
| H              | -3.827  | -6.875  | 4.388  | H | -15.519 | -7.167  | 0.475  |
| C              | -5.392  | -7.893  | 3.352  | N | -13.081 | -8.281  | 0.110  |
| O              | -6.678  | -7.931  | 3.183  | H | -13.700 | -9.085  | 0.318  |
| O              | -4.569  | -8.680  | 2.833  | C | -13.472 | -6.965  | -0.097 |
| C              | -10.282 | -7.156  | 5.530  | C | -11.726 | -8.304  | 0.120  |
| H              | -11.034 | -6.778  | 6.230  | H | -11.139 | -9.195  | 0.266  |

|    |         |         |        |   |         |         |        |
|----|---------|---------|--------|---|---------|---------|--------|
| N  | -11.228 | -7.088  | -0.076 | H | -9.274  | -6.793  | 5.807  |
| C  | -12.312 | -6.249  | -0.219 | C | -10.633 | -6.600  | 4.100  |
| H  | -12.187 | -5.188  | -0.373 | H | -11.657 | -6.887  | 3.826  |
| Fe | -7.672  | -8.628  | 1.689  | H | -10.666 | -5.509  | 4.165  |
| Fe | -9.326  | -6.011  | 0.055  | C | -9.791  | -6.915  | 2.851  |
| C  | -3.325  | -3.107  | 2.926  | O | -9.307  | -8.078  | 2.678  |
| C  | -4.667  | -2.703  | 2.991  | O | -9.716  | -5.972  | 2.009  |
| C  | -5.540  | -2.950  | 1.927  | C | -6.616  | -10.789 | 4.369  |
| C  | -5.083  | -3.600  | 0.777  | H | -7.028  | -9.834  | 4.700  |
| C  | -3.750  | -4.013  | 0.706  | H | -5.596  | -10.609 | 4.014  |
| C  | -2.882  | -3.768  | 1.771  | N | -8.839  | -12.617 | 2.077  |
| C  | -2.380  | -2.848  | 4.073  | H | -9.335  | -13.433 | 1.647  |
| H  | -2.345  | -3.702  | 4.762  | C | -7.499  | -11.365 | 3.301  |
| H  | -2.680  | -1.970  | 4.654  | C | -8.929  | -11.344 | 1.665  |
| H  | -1.352  | -2.696  | 3.731  | H | -9.587  | -11.027 | 0.874  |
| H  | -5.024  | -2.170  | 3.869  | N | -8.111  | -10.557 | 2.363  |
| H  | -6.575  | -2.621  | 1.993  | C | -7.935  | -12.658 | 3.104  |
| H  | -5.747  | -3.782  | -0.061 | H | -7.680  | -13.584 | 3.595  |
| H  | -3.387  | -4.511  | -0.187 | C | -9.175  | -3.027  | -3.237 |
| H  | -1.843  | -4.075  | 1.696  | H | -10.053 | -2.530  | -3.661 |
| O  | -7.498  | -7.026  | 0.734  | H | -9.322  | -4.110  | -3.299 |
| O  | -6.368  | -6.391  | 0.680  | C | -8.994  | -2.633  | -1.758 |
| O  | -8.592  | -9.210  | -0.055 | H | -8.004  | -2.901  | -1.383 |
| H  | -8.253  | -8.637  | -0.855 | H | -9.131  | -1.553  | -1.617 |
| H  | -8.204  | -10.072 | -0.271 | C | -10.042 | -3.366  | -0.926 |
| O  | -4.743  | -8.679  | -1.146 | O | -11.250 | -3.148  | -1.142 |
| H  | -3.816  | -8.959  | -1.177 | O | -9.583  | -4.176  | -0.034 |
| H  | -5.110  | -8.924  | -2.026 | C | -9.448  | -8.943  | -4.265 |
| O  | -6.062  | -9.339  | 0.950  | H | -8.638  | -9.570  | -3.880 |
| H  | -5.355  | -9.215  | 1.674  | H | -9.548  | -9.183  | -5.326 |
| H  | -5.641  | -9.005  | 0.093  | C | -9.066  | -7.456  | -4.062 |
|    |         |         |        | H | -8.198  | -7.237  | -4.696 |
| 3R |         |         |        | H | -9.861  | -6.773  | -4.364 |
| C  | -5.633  | -6.846  | 5.633  | C | -8.678  | -7.197  | -2.602 |
| H  | -5.143  | -7.551  | 6.313  | O | -7.819  | -7.985  | -2.104 |
| H  | -6.661  | -7.182  | 5.466  | O | -9.287  | -6.291  | -1.956 |
| C  | -4.902  | -6.794  | 4.281  | C | -14.893 | -6.500  | -0.114 |
| H  | -5.100  | -5.857  | 3.744  | H | -14.939 | -5.497  | 0.319  |
| H  | -3.820  | -6.889  | 4.398  | H | -15.540 | -7.155  | 0.481  |
| C  | -5.389  | -7.893  | 3.354  | N | -13.126 | -8.330  | 0.098  |
| O  | -6.676  | -7.926  | 3.185  | H | -13.757 | -9.127  | 0.310  |
| O  | -4.569  | -8.681  | 2.832  | C | -13.489 | -7.004  | -0.093 |
| C  | -10.262 | -7.147  | 5.498  | C | -11.773 | -8.384  | 0.111  |
| H  | -10.990 | -6.751  | 6.214  | H | -11.207 | -9.290  | 0.250  |

|     |         |         |        |   |        |         |        |
|-----|---------|---------|--------|---|--------|---------|--------|
| N   | -11.254 | -7.177  | -0.069 | H | -9.342 | -6.752  | 6.003  |
| C   | -12.316 | -6.309  | -0.205 | C | 10.677 | -6.485  | 4.303  |
| H   | -12.164 | -5.249  | -0.347 | H | 11.697 | -6.753  | 3.999  |
| Fe  | -7.672  | -8.614  | 1.686  | H | 10.707 | -5.396  | 4.423  |
| Fe  | -9.431  | -6.156  | 0.027  | C | -9.812 | -6.738  | 3.057  |
| C   | -3.323  | -3.104  | 2.935  | O | -9.061 | -7.766  | 2.984  |
| C   | -4.662  | -2.694  | 3.012  | O | -9.969 | -5.900  | 2.133  |
| C   | -5.547  | -2.941  | 1.957  | C | -6.683 | -10.746 | 4.366  |
| C   | -5.105  | -3.596  | 0.806  | H | -7.076 | -9.793  | 4.726  |
| C   | -3.774  | -4.013  | 0.722  | H | -5.669 | -10.570 | 3.992  |
| C   | -2.894  | -3.769  | 1.776  | N | -8.871 | -12.504 | 1.978  |
| C   | -2.366  | -2.849  | 4.074  | H | -9.361 | -13.322 | 1.550  |
| H   | -2.332  | -3.702  | 4.765  | C | -7.579 | -11.286 | 3.286  |
| H   | -2.656  | -1.968  | 4.655  | C | -8.905 | -11.220 | 1.570  |
| H   | -1.341  | -2.705  | 3.723  | H | -9.491 | -10.882 | 0.730  |
| H   | -5.008  | -2.158  | 3.892  | N | -8.125 | -10.453 | 2.327  |
| H   | -6.580  | -2.609  | 2.033  | C | -8.032 | -12.567 | 3.059  |
| H   | -5.781  | -3.781  | -0.023 | H | -7.823 | -13.503 | 3.553  |
| H   | -3.421  | -4.514  | -0.175 | C | -9.193 | -3.045  | -3.266 |
| H   | -1.856  | -4.081  | 1.693  | H | 10.053 | -2.496  | -3.662 |
| O   | -7.536  | -6.990  | 0.769  | H | -9.371 | -4.118  | -3.386 |
| O   | -6.398  | -6.385  | 0.658  | C | -9.017 | -2.758  | -1.767 |
| O   | -8.585  | -9.211  | -0.057 | H | -8.080 | -3.174  | -1.387 |
| H   | -8.254  | -8.611  | -0.832 | H | -9.012 | -1.679  | -1.563 |
| H   | -8.172  | -10.060 | -0.283 | C | 10.178 | -3.372  | -0.984 |
| O   | -4.729  | -8.674  | -1.155 | O | 11.343 | -3.050  | -1.284 |
| H   | -3.803  | -8.957  | -1.192 | O | -9.878 | -4.178  | -0.029 |
| H   | -5.105  | -8.910  | -2.034 | C | -9.441 | -8.977  | -4.301 |
| O   | -6.060  | -9.310  | 0.937  | H | -8.624 | -9.582  | -3.896 |
| H   | -5.354  | -9.201  | 1.665  | H | -9.553 | -9.273  | -5.346 |
| H   | -5.633  | -8.974  | 0.085  | C | -9.050 | -7.485  | -4.179 |
|     |         |         |        | H | -8.232 | -7.298  | -4.886 |
|     |         |         |        | H | -9.867 | -6.812  | -4.447 |
| IM1 |         |         |        | C | -8.544 | -7.161  | -2.765 |
| C   | -5.342  | -7.093  | 5.963  | O | -7.596 | -7.888  | -2.334 |
| H   | -4.948  | -7.599  | 6.851  | O | -9.121 | -6.263  | -2.091 |
| H   | -6.306  | -7.542  | 5.707  | C | 14.891 | -6.505  | -0.122 |
| C   | -4.358  | -7.287  | 4.794  | H | 14.934 | -5.507  | 0.322  |
| H   | -3.958  | -6.345  | 4.395  | H | 15.529 | -7.168  | 0.474  |
| H   | -3.478  | -7.853  | 5.109  | N | 13.110 | -8.323  | 0.076  |
| C   | -4.943  | -7.991  | 3.576  | H | 13.733 | -9.118  | 0.310  |
| O   | -6.207  | -7.902  | 3.394  | C | 13.487 | -7.004  | -0.133 |
| O   | -4.135  | -8.584  | 2.817  | C | 11.756 | -8.368  | 0.037  |
| C   | 10.318  | -7.106  | 5.662  | H | 11.186 | -9.272  | 0.177  |
| H   | 11.065  | -6.782  | 6.395  |   |        |         |        |

|     |        |        |        |   |        |         |        |
|-----|--------|--------|--------|---|--------|---------|--------|
| N   | 11.249 | -7.164 | -0.194 | H | -9.309 | -6.761  | 5.944  |
| C   | 12.322 | -6.309 | -0.311 | C | 10.673 | -6.492  | 4.263  |
| H   | 12.186 | -5.251 | -0.481 | H | 11.702 | -6.757  | 3.983  |
| Fe  | -7.473 | -8.309 | 1.818  | H | 10.698 | -5.403  | 4.384  |
| Fe  | -9.363 | -6.126 | 0.055  | C | -9.843 | -6.745  | 2.991  |
| C   | -3.812 | -3.632 | 2.555  | O | -9.099 | -7.771  | 2.888  |
| C   | -5.036 | -2.914 | 2.471  | O | 10.033 | -5.899  | 2.073  |
| C   | -6.094 | -3.397 | 1.754  | C | -6.695 | -10.736 | 4.364  |
| C   | -6.039 | -4.712 | 1.052  | H | -7.094 | -9.789  | 4.729  |
| C   | -4.729 | -5.422 | 1.176  | H | -5.682 | -10.549 | 3.994  |
| C   | -3.690 | -4.887 | 1.880  | N | -8.870 | -12.510 | 1.975  |
| C   | -2.667 | -3.098 | 3.362  | H | -9.359 | -13.331 | 1.552  |
| H   | -2.438 | -3.766 | 4.203  | C | -7.583 | -11.277 | 3.277  |
| H   | -2.881 | -2.108 | 3.770  | C | -8.893 | -11.235 | 1.544  |
| H   | -1.753 | -3.039 | 2.758  | H | -9.462 | -10.908 | 0.689  |
| H   | -5.124 | -1.967 | 2.998  | N | -8.116 | -10.458 | 2.295  |
| H   | -7.037 | -2.863 | 1.708  | C | -8.040 | -12.559 | 3.064  |
| H   | -6.281 | -4.577 | -0.017 | H | -7.840 | -13.489 | 3.574  |
| H   | -4.643 | -6.387 | 0.687  | C | -9.210 | -2.997  | -3.265 |
| H   | -2.752 | -5.430 | 1.957  | H | 10.082 | -2.533  | -3.739 |
| O   | -7.465 | -6.586 | 0.746  | H | -9.339 | -4.084  | -3.279 |
| O   | -7.139 | -5.472 | 1.637  | C | -9.083 | -2.520  | -1.804 |
| O   | -8.297 | -8.936 | -0.135 | H | -8.084 | -2.702  | -1.400 |
| H   | -7.950 | -8.421 | -0.953 | H | -9.298 | -1.449  | -1.712 |
| H   | -7.945 | -9.827 | -0.277 | C | 10.086 | -3.299  | -0.962 |
| O   | -4.677 | -8.742 | -1.328 | O | 11.306 | -3.138  | -1.147 |
| H   | -3.771 | -9.076 | -1.421 | O | -9.566 | -4.113  | -0.104 |
| H   | -5.098 | -8.923 | -2.198 | C | -9.452 | -8.991  | -4.325 |
| O   | -5.787 | -9.105 | 0.981  | H | -8.627 | -9.577  | -3.909 |
| H   | -5.020 | -8.983 | 1.627  | H | -9.564 | -9.316  | -5.362 |
| H   | -5.449 | -8.969 | 0.052  | C | -9.079 | -7.492  | -4.243 |
|     |        |        |        | H | -8.236 | -7.321  | -4.924 |
| TS2 |        |        |        | H | -9.893 | -6.839  | -4.563 |
| C   | -5.442 | -7.005 | 5.833  | C | -8.634 | -7.131  | -2.818 |
| H   | -5.067 | -7.616 | 6.662  | O | -7.659 | -7.796  | -2.357 |
| H   | -6.426 | -7.380 | 5.541  | O | -9.307 | -6.277  | -2.168 |
| C   | -4.482 | -7.104 | 4.634  | C | 14.919 | -6.508  | -0.118 |
| H   | -4.333 | -6.139 | 4.132  | H | 14.953 | -5.510  | 0.327  |
| H   | -3.490 | -7.452 | 4.929  | H | 15.569 | -7.165  | 0.471  |
| C   | -5.004 | -7.995 | 3.518  | N | 13.158 | -8.350  | 0.074  |
| O   | -6.273 | -7.973 | 3.330  | H | 13.787 | -9.143  | 0.314  |
| O   | -4.181 | -8.647 | 2.829  | C | 13.521 | -7.025  | -0.123 |
| C   | 10.294 | -7.108 | 5.621  | C | 11.808 | -8.416  | 0.021  |
| H   | 11.025 | -6.766 | 6.363  | H | 11.247 | -9.328  | 0.148  |

|     |         |        |        |   |         |         |        |
|-----|---------|--------|--------|---|---------|---------|--------|
| N   | 11.290  | -7.217 | -0.210 | H | -9.328  | -6.750  | 5.936  |
| C   | 12.351  | -6.345 | -0.310 | C | -10.613 | -6.524  | 4.188  |
| H   | 12.204  | -5.286 | -0.480 | H | -11.610 | -6.829  | 3.840  |
| Fe  | -7.486  | -8.342 | 1.741  | H | -10.677 | -5.434  | 4.280  |
| Fe  | -9.495  | -6.098 | -0.032 | C | -9.671  | -6.782  | 2.998  |
| C   | -3.968  | -3.650 | 2.615  | O | -8.879  | -7.778  | 3.058  |
| C   | -5.207  | -3.008 | 2.384  | O | -9.776  | -5.992  | 2.024  |
| C   | -6.090  | -3.482 | 1.437  | C | -6.711  | -10.714 | 4.394  |
| C   | -5.818  | -4.701 | 0.712  | H | -7.128  | -9.780  | 4.777  |
| C   | -4.540  | -5.334 | 0.946  | H | -5.701  | -10.506 | 4.027  |
| C   | -3.660  | -4.821 | 1.873  | N | -8.834  | -12.474 | 1.945  |
| C   | -2.978  | -3.095 | 3.603  | H | -9.327  | -13.289 | 1.520  |
| H   | -2.674  | -3.853 | 4.336  | C | -7.583  | -11.258 | 3.297  |
| H   | -3.384  | -2.237 | 4.147  | C | -8.800  | -11.208 | 1.487  |
| H   | -2.058  | -2.772 | 3.097  | H | -9.226  | -10.874 | 0.549  |
| H   | -5.446  | -2.109 | 2.946  | N | -8.049  | -10.444 | 2.277  |
| H   | -7.027  | -2.971 | 1.246  | C | -8.065  | -12.528 | 3.081  |
| H   | -6.240  | -4.790 | -0.285 | H | -7.918  | -13.455 | 3.612  |
| H   | -4.296  | -6.232 | 0.388  | C | -9.157  | -3.086  | -3.248 |
| H   | -2.704  | -5.312 | 2.036  | H | -10.026 | -2.525  | -3.609 |
| O   | -7.550  | -6.732 | 0.495  | H | -9.339  | -4.153  | -3.404 |
| O   | -7.095  | -5.796 | 1.410  | C | -8.945  | -2.850  | -1.741 |
| O   | -8.328  | -9.070 | -0.229 | H | -7.983  | -3.246  | -1.403 |
| H   | -8.019  | -8.482 | -0.997 | H | -8.980  | -1.781  | -1.496 |
| H   | -7.896  | -9.918 | -0.410 | C | -10.061 | -3.546  | -0.970 |
| O   | -4.670  | -8.752 | -1.367 | O | -11.240 | -3.192  | -1.137 |
| H   | -3.765  | -9.087 | -1.471 | O | -9.699  | -4.480  | -0.144 |
| H   | -5.105  | -8.916 | -2.233 | C | -9.450  | -8.993  | -4.328 |
| O   | -5.791  | -9.096 | 0.927  | H | -8.624  | -9.565  | -3.896 |
| H   | -5.040  | -9.024 | 1.599  | H | -9.548  | -9.339  | -5.360 |
| H   | -5.431  | -8.946 | 0.007  | C | -9.090  | -7.490  | -4.300 |
| IM2 |         |        |        | H | -8.345  | -7.317  | -5.083 |
| C   | -5.390  | -6.998 | 5.806  | H | -9.956  | -6.862  | -4.523 |
| H   | -4.951  | -7.591 | 6.616  | C | -8.446  | -7.050  | -2.975 |
| H   | -6.369  | -7.415 | 5.559  | O | -7.254  | -7.284  | -2.768 |
| C   | -4.477  | -7.047 | 4.560  | O | -9.238  | -6.435  | -2.135 |
| H   | -4.392  | -6.073 | 4.056  | C | -14.912 | -6.530  | -0.101 |
| H   | -3.462  | -7.364 | 4.809  | H | -14.946 | -5.535  | 0.349  |
| C   | -5.016  | -7.945 | 3.464  | H | -15.565 | -7.190  | 0.482  |
| O   | -6.307  | -7.913 | 3.340  | N | -13.149 | -8.384  | 0.014  |
| O   | -4.244  | -8.614 | 2.745  | H | -13.775 | -9.182  | 0.243  |
| C   | -10.299 | -7.105 | 5.582  | C | -13.514 | -7.047  | -0.106 |
| H   | -11.062 | -6.745 | 6.281  | C | -11.801 | -8.452  | -0.049 |
|     |         |        |        | H | -11.231 | -9.368  | -0.023 |

|                 |         |         |        |   |         |         |        |
|-----------------|---------|---------|--------|---|---------|---------|--------|
| N               | -11.291 | -7.235  | -0.203 | H | -9.298  | -6.755  | 5.947  |
| C               | -12.346 | -6.353  | -0.247 | C | -10.503 | -6.509  | 4.148  |
| H               | -12.191 | -5.291  | -0.364 | H | -11.501 | -6.776  | 3.771  |
| Fe              | -7.459  | -8.348  | 1.866  | H | -10.528 | -5.418  | 4.230  |
| Fe              | -9.373  | -6.426  | -0.178 | C | -9.536  | -6.846  | 3.004  |
| C               | -3.630  | -3.219  | 2.978  | O | -8.914  | -7.941  | 3.008  |
| C               | -4.977  | -3.044  | 2.963  | O | -9.452  | -6.004  | 2.049  |
| C               | -5.816  | -3.665  | 1.927  | C | -6.688  | -10.765 | 4.356  |
| C               | -5.119  | -4.333  | 0.764  | H | -7.117  | -9.820  | 4.699  |
| C               | -3.648  | -4.315  | 0.771  | H | -5.672  | -10.560 | 4.002  |
| C               | -2.969  | -3.874  | 1.853  | N | -8.737  | -12.598 | 1.901  |
| C               | -2.757  | -2.640  | 4.060  | H | -9.255  | -13.410 | 1.493  |
| H               | -2.259  | -3.430  | 4.637  | C | -7.529  | -11.349 | 3.255  |
| H               | -3.328  | -2.011  | 4.748  | C | -8.660  | -11.352 | 1.401  |
| H               | -1.955  | -2.032  | 3.630  | H | -9.105  | -11.074 | 0.456  |
| H               | -5.456  | -2.403  | 3.700  | N | -7.938  | -10.568 | 2.190  |
| H               | -6.818  | -3.265  | 1.780  | C | -8.020  | -12.621 | 3.067  |
| H               | -5.621  | -4.392  | -0.200 | H | -7.905  | -13.532 | 3.632  |
| H               | -3.123  | -4.633  | -0.124 | C | -9.216  | -3.021  | -3.274 |
| H               | -1.882  | -3.892  | 1.849  | H | -10.084 | -2.545  | -3.741 |
| O               | -8.239  | -7.723  | 0.359  | H | -9.346  | -4.107  | -3.321 |
| O               | -5.762  | -5.103  | 1.801  | C | -9.110  | -2.595  | -1.796 |
| O               | -8.880  | -9.897  | -1.096 | H | -8.125  | -2.818  | -1.378 |
| H               | -8.323  | -9.147  | -0.815 | H | -9.298  | -1.521  | -1.677 |
| H               | -8.347  | -10.514 | -1.631 | C | -10.157 | -3.368  | -0.997 |
| O               | -4.864  | -8.811  | -1.445 | O | -11.366 | -3.154  | -1.199 |
| H               | -3.952  | -9.135  | -1.496 | O | -9.685  | -4.222  | -0.155 |
| H               | -5.227  | -8.899  | -2.352 | C | -9.434  | -9.002  | -4.317 |
| O               | -5.935  | -8.904  | 0.880  | H | -8.616  | -9.608  | -3.913 |
| H               | -5.130  | -8.886  | 1.491  | H | -9.549  | -9.309  | -5.358 |
| H               | -5.675  | -8.780  | -0.083 | C | -9.035  | -7.510  | -4.220 |
|                 |         |         |        | H | -8.198  | -7.346  | -4.908 |
| <sup>11</sup> R |         |         |        | H | -9.842  | -6.839  | -4.518 |
| C               | -5.211  | -7.150  | 6.053  | C | -8.572  | -7.175  | -2.800 |
| H               | -4.782  | -7.567  | 6.972  | O | -7.557  | -7.804  | -2.368 |
| H               | -6.144  | -7.677  | 5.837  | O | -9.273  | -6.382  | -2.099 |
| C               | -4.211  | -7.371  | 4.898  | C | -14.992 | -6.466  | -0.112 |
| H               | -3.720  | -6.451  | 4.555  | H | -15.031 | -5.456  | 0.307  |
| H               | -3.388  | -8.014  | 5.222  | H | -15.673 | -7.101  | 0.467  |
| C               | -4.806  | -7.999  | 3.647  | N | -13.273 | -8.331  | 0.153  |
| O               | -6.065  | -7.852  | 3.467  | H | -13.912 | -9.123  | 0.379  |
| O               | -4.030  | -8.610  | 2.869  | C | -13.603 | -7.000  | -0.053 |
| C               | -10.260 | -7.096  | 5.558  | C | -11.926 | -8.421  | 0.161  |
| H               | -11.041 | -6.715  | 6.225  | H | -11.405 | -9.352  | 0.325  |

|     |         |        |        |   |         |         |        |
|-----|---------|--------|--------|---|---------|---------|--------|
| N   | -11.371 | -7.231 | -0.041 | H | -9.440  | -6.675  | 6.088  |
| C   | -12.412 | -6.339 | -0.180 | C | -10.742 | -6.382  | 4.371  |
| H   | -12.233 | -5.286 | -0.343 | H | -11.746 | -6.662  | 4.029  |
| Fe  | -7.260  | -8.527 | 1.956  | H | -10.788 | -5.296  | 4.521  |
| Fe  | -9.493  | -6.208 | -0.014 | C | -9.820  | -6.597  | 3.162  |
| C   | -3.256  | -2.992 | 3.108  | O | -8.857  | -7.418  | 3.288  |
| C   | -4.518  | -2.428 | 3.339  | O | -10.101 | -5.941  | 2.125  |
| C   | -5.534  | -2.537 | 2.389  | C | -6.694  | -10.700 | 4.422  |
| C   | -5.302  | -3.210 | 1.189  | H | -7.079  | -9.759  | 4.822  |
| C   | -4.053  | -3.792 | 0.952  | H | -5.686  | -10.520 | 4.035  |
| C   | -3.041  | -3.686 | 1.908  | N | -8.904  | -12.374 | 1.999  |
| C   | -2.159  | -2.855 | 4.130  | H | -9.380  | -13.177 | 1.544  |
| H   | -2.160  | -3.693 | 4.839  | C | -7.614  | -11.206 | 3.351  |
| H   | -2.265  | -1.937 | 4.717  | C | -8.952  | -11.069 | 1.647  |
| H   | -1.167  | -2.847 | 3.670  | H | -9.442  | -10.714 | 0.752  |
| H   | -4.699  | -1.878 | 4.258  | N | -8.177  | -10.332 | 2.441  |
| H   | -6.504  | -2.087 | 2.581  | C | -8.056  | -12.480 | 3.074  |
| H   | -6.080  | -3.270 | 0.436  | H | -7.843  | -13.434 | 3.531  |
| H   | -3.863  | -4.299 | 0.011  | C | -9.167  | -3.093  | -3.248 |
| H   | -2.065  | -4.123 | 1.710  | H | -10.037 | -2.537  | -3.611 |
| O   | -6.848  | -5.641 | -0.250 | H | -9.341  | -4.162  | -3.408 |
| O   | -6.147  | -6.077 | 0.647  | C | -8.968  | -2.867  | -1.740 |
| O   | -8.342  | -8.207 | -0.023 | H | -8.014  | -3.282  | -1.407 |
| H   | -7.834  | -8.052 | -0.923 | H | -8.977  | -1.796  | -1.496 |
| H   | -8.957  | -8.923 | -0.228 | C | -10.105 | -3.534  | -0.958 |
| O   | -4.687  | -8.778 | -1.490 | O | -11.274 | -3.154  | -1.177 |
| H   | -3.762  | -9.056 | -1.584 | O | -9.779  | -4.428  | -0.096 |
| H   | -5.114  | -9.022 | -2.338 | C | -9.425  | -8.946  | -4.230 |
| O   | -5.608  | -8.956 | 0.919  | H | -8.623  | -9.568  | -3.823 |
| H   | -4.838  | -8.853 | 1.570  | H | -9.500  | -9.196  | -5.292 |
| H   | -5.312  | -8.905 | -0.030 | C | -9.043  | -7.454  | -4.054 |
| TS3 |         |        |        | H | -8.333  | -7.202  | -4.850 |
| C   | -5.243  | -7.179 | 6.068  | H | -9.908  | -6.799  | -4.170 |
| H   | -4.765  | -7.565 | 6.976  | C | -8.321  | -7.134  | -2.729 |
| H   | -6.191  | -7.706 | 5.930  | O | -7.170  | -7.545  | -2.549 |
| C   | -4.318  | -7.476 | 4.872  | O | -8.967  | -6.386  | -1.883 |
| H   | -3.693  | -6.622 | 4.580  | C | -14.906 | -6.514  | -0.114 |
| H   | -3.597  | -8.250 | 5.149  | H | -14.957 | -5.519  | 0.335  |
| C   | -4.995  | -7.968 | 3.591  | H | -15.542 | -7.186  | 0.473  |
| O   | -6.256  | -7.755 | 3.481  | N | -13.113 | -8.332  | 0.024  |
| O   | -4.269  | -8.540 | 2.742  | H | -13.729 | -9.135  | 0.253  |
| C   | -10.399 | -7.043 | 5.719  | C | -13.498 | -7.004  | -0.127 |
| H   | -11.172 | -6.763 | 6.443  | C | -11.762 | -8.374  | -0.029 |
|     |         |        |        | H | -11.173 | -9.276  | 0.026  |

|     |         |         |        |   |         |         |        |
|-----|---------|---------|--------|---|---------|---------|--------|
| N   | -11.270 | -7.154  | -0.211 | H | -9.517  | -6.622  | 6.162  |
| C   | -12.340 | -6.296  | -0.284 | C | -10.834 | -6.294  | 4.462  |
| H   | -12.202 | -5.234  | -0.421 | H | -11.843 | -6.559  | 4.126  |
| Fe  | -7.565  | -8.111  | 2.010  | H | -10.878 | -5.213  | 4.647  |
| Fe  | -9.285  | -6.406  | 0.076  | C | -9.934  | -6.478  | 3.235  |
| C   | -4.711  | -3.847  | 2.402  | O | -8.951  | -7.276  | 3.348  |
| C   | -6.002  | -3.376  | 2.165  | O | -10.245 | -5.829  | 2.200  |
| C   | -6.782  | -3.965  | 1.174  | C | -6.758  | -10.670 | 4.409  |
| C   | -6.377  | -5.202  | 0.469  | H | -7.141  | -9.733  | 4.819  |
| C   | -5.001  | -5.686  | 0.829  | H | -5.763  | -10.471 | 3.997  |
| C   | -4.226  | -5.025  | 1.719  | N | -8.980  | -12.370 | 2.009  |
| C   | -3.799  | -3.158  | 3.368  | H | -9.433  | -13.185 | 1.548  |
| H   | -3.423  | -3.869  | 4.114  | C | -7.705  | -11.184 | 3.360  |
| H   | -4.283  | -2.322  | 3.878  | C | -9.132  | -11.052 | 1.737  |
| H   | -2.911  | -2.787  | 2.838  | H | -9.711  | -10.673 | 0.912  |
| H   | -6.383  | -2.532  | 2.733  | N | -8.375  | -10.307 | 2.533  |
| H   | -7.769  | -3.589  | 0.933  | C | -8.072  | -12.472 | 3.035  |
| H   | -6.494  | -5.179  | -0.624 | H | -7.779  | -13.432 | 3.432  |
| H   | -4.646  | -6.583  | 0.333  | C | -9.174  | -3.094  | -3.257 |
| H   | -3.227  | -5.384  | 1.953  | H | -10.020 | -2.476  | -3.572 |
| O   | -8.700  | -8.076  | 0.637  | H | -9.404  | -4.141  | -3.483 |
| O   | -7.417  | -5.942  | 1.111  | C | -8.957  | -2.994  | -1.740 |
| O   | -9.017  | -10.046 | -1.049 | H | -8.079  | -3.563  | -1.423 |
| H   | -8.514  | -9.326  | -0.627 | H | -8.811  | -1.952  | -1.424 |
| H   | -8.420  | -10.620 | -1.563 | C | -10.183 | -3.520  | -0.996 |
| O   | -4.797  | -8.765  | -1.325 | O | -11.312 | -3.085  | -1.297 |
| H   | -3.926  | -9.188  | -1.358 | O | -9.985  | -4.362  | -0.040 |
| H   | -5.166  | -8.872  | -2.226 | C | -9.443  | -8.923  | -4.223 |
| O   | -6.066  | -8.779  | 0.949  | H | -8.625  | -9.532  | -3.827 |
| H   | -5.247  | -8.787  | 1.537  | H | -9.525  | -9.174  | -5.283 |
| H   | -5.793  | -8.754  | -0.007 | C | -9.086  | -7.429  | -4.028 |
|     |         |         |        | H | -8.278  | -7.185  | -4.727 |
| TS4 |         |         |        | H | -9.926  | -6.774  | -4.260 |
| C   | -5.303  | -7.175  | 6.023  | C | -8.558  | -7.151  | -2.607 |
| H   | -4.797  | -7.593  | 6.901  | O | -7.544  | -7.785  | -2.241 |
| H   | -6.265  | -7.684  | 5.908  | O | -9.211  | -6.327  | -1.877 |
| C   | -4.440  | -7.469  | 4.784  | C | -15.023 | -6.460  | -0.124 |
| H   | -3.530  | -6.868  | 4.741  | H | -15.103 | -5.462  | 0.316  |
| H   | -4.108  | -8.514  | 4.862  | H | -15.669 | -7.138  | 0.444  |
| C   | -5.148  | -7.349  | 3.434  | N | -13.210 | -8.233  | 0.174  |
| O   | -6.369  | -7.681  | 3.379  | H | -13.817 | -9.040  | 0.414  |
| O   | -4.441  | -6.933  | 2.466  | C | -13.612 | -6.931  | -0.095 |
| C   | -10.467 | -7.002  | 5.780  | C | -11.857 | -8.250  | 0.155  |
| H   | -11.245 | -6.766  | 6.516  | H | -11.254 | -9.119  | 0.359  |

|     |         |         |        |   |         |         |        |
|-----|---------|---------|--------|---|---------|---------|--------|
| N   | -11.382 | -7.044  | -0.126 | H | -9.513  | -6.648  | 6.182  |
| C   | -12.463 | -6.219  | -0.297 | C | -10.798 | -6.330  | 4.459  |
| H   | -12.337 | -5.170  | -0.510 | H | -11.790 | -6.623  | 4.093  |
| Fe  | -7.782  | -8.055  | 2.006  | H | -10.873 | -5.250  | 4.641  |
| Fe  | -9.412  | -6.251  | 0.185  | C | -9.847  | -6.502  | 3.266  |
| C   | -4.822  | -3.262  | 2.761  | O | -8.893  | -7.331  | 3.372  |
| C   | -6.179  | -3.373  | 3.186  | O | -10.102 | -5.802  | 2.243  |
| C   | -7.113  | -4.180  | 2.567  | C | -6.743  | -10.657 | 4.425  |
| C   | -6.742  | -4.966  | 1.439  | H | -7.150  | -9.733  | 4.845  |
| C   | -5.353  | -4.923  | 1.029  | H | -5.744  | -10.444 | 4.030  |
| C   | -4.458  | -3.978  | 1.645  | N | -8.922  | -12.354 | 1.981  |
| C   | -3.846  | -2.410  | 3.535  | H | -9.384  | -13.165 | 1.526  |
| H   | -3.444  | -2.957  | 4.398  | C | -7.659  | -11.173 | 3.352  |
| H   | -4.318  | -1.502  | 3.920  | C | -9.000  | -11.051 | 1.640  |
| H   | -2.988  | -2.124  | 2.918  | H | -9.473  | -10.686 | 0.740  |
| H   | -6.491  | -2.780  | 4.045  | N | -8.247  | -10.306 | 2.449  |
| H   | -8.139  | -4.213  | 2.911  | C | -8.073  | -12.451 | 3.059  |
| H   | -5.142  | -5.250  | 0.015  | H | -7.844  | -13.405 | 3.508  |
| H   | -4.964  | -5.999  | 1.679  | C | -9.135  | -3.078  | -3.181 |
| H   | -3.443  | -3.914  | 1.261  | H | -10.043 | -2.632  | -3.600 |
| O   | -8.990  | -8.000  | 0.775  | H | -9.227  | -4.169  | -3.220 |
| O   | -7.541  | -5.796  | 0.851  | C | -8.951  | -2.645  | -1.706 |
| O   | -8.222  | -10.029 | -0.876 | H | -7.918  | -2.783  | -1.376 |
| H   | -8.075  | -9.186  | -1.355 | H | -9.217  | -1.590  | -1.570 |
| H   | -8.022  | -10.744 | -1.515 | C | -9.861  | -3.508  | -0.823 |
| O   | -4.651  | -8.534  | -0.850 | O | -11.088 | -3.270  | -0.812 |
| H   | -3.732  | -8.837  | -0.847 | O | -9.253  | -4.431  | -0.169 |
| H   | -5.001  | -8.828  | -1.720 | C | -9.438  | -8.996  | -4.303 |
| O   | -6.508  | -9.056  | 0.907  | H | -8.642  | -9.649  | -3.933 |
| H   | -7.086  | -9.573  | 0.275  | H | -9.557  | -9.227  | -5.364 |
| H   | -5.779  | -8.671  | 0.347  | C | -8.992  | -7.531  | -4.100 |
|     |         |         |        | H | -8.188  | -7.326  | -4.817 |
|     |         |         |        | H | -9.798  | -6.822  | -4.304 |
| IM3 |         |         |        | C | -8.426  | -7.299  | -2.684 |
| C   | -5.271  | -7.149  | 6.025  | O | -7.418  | -7.949  | -2.340 |
| H   | -4.819  | -7.573  | 6.930  | O | -9.067  | -6.473  | -1.943 |
| H   | -6.224  | -7.654  | 5.848  | C | -14.891 | -6.490  | -0.126 |
| C   | -4.324  | -7.411  | 4.836  | H | -14.982 | -5.501  | 0.330  |
| H   | -3.722  | -6.535  | 4.556  | H | -15.499 | -7.190  | 0.458  |
| H   | -3.584  | -8.168  | 5.111  | N | -13.041 | -8.237  | 0.031  |
| C   | -4.996  | -7.904  | 3.551  | H | -13.640 | -9.053  | 0.236  |
| O   | -6.216  | -7.574  | 3.357  | C | -13.465 | -6.922  | -0.133 |
| O   | -4.289  | -8.600  | 2.776  | C | -11.689 | -8.237  | 0.017  |
| C   | -10.459 | -7.026  | 5.788  | H | -11.066 | -9.111  | 0.107  |
| H   | -11.248 | -6.791  | 6.511  |   |         |         |        |

|     |         |         |        |   |         |         |        |
|-----|---------|---------|--------|---|---------|---------|--------|
| N   | -11.233 | -6.998  | -0.147 | H | -9.447  | -6.678  | 6.092  |
| C   | -12.325 | -6.175  | -0.258 | C | -10.675 | -6.400  | 4.318  |
| H   | -12.202 | -5.111  | -0.389 | H | -11.651 | -6.711  | 3.922  |
| Fe  | -7.715  | -8.212  | 1.932  | H | -10.759 | -5.315  | 4.457  |
| Fe  | -9.290  | -6.408  | 0.118  | C | -9.671  | -6.616  | 3.176  |
| C   | -4.591  | -3.777  | 2.573  | O | -8.820  | -7.545  | 3.286  |
| C   | -5.951  | -3.579  | 2.911  | O | -9.784  | -5.846  | 2.173  |
| C   | -6.937  | -4.344  | 2.329  | C | -6.731  | -10.695 | 4.396  |
| C   | -6.632  | -5.270  | 1.220  | H | -7.145  | -9.762  | 4.788  |
| C   | -5.196  | -5.512  | 0.988  | H | -5.726  | -10.489 | 4.015  |
| C   | -4.235  | -4.747  | 1.602  | N | -8.877  | -12.451 | 1.961  |
| C   | -3.518  | -2.996  | 3.274  | H | -9.357  | -13.269 | 1.526  |
| H   | -3.045  | -3.632  | 4.035  | C | -7.622  | -11.240 | 3.315  |
| H   | -3.914  | -2.110  | 3.775  | C | -8.884  | -11.177 | 1.531  |
| H   | -2.722  | -2.701  | 2.582  | H | -9.312  | -10.832 | 0.599  |
| H   | -6.206  | -2.843  | 3.668  | N | -8.132  | -10.414 | 2.326  |
| H   | -7.983  | -4.230  | 2.586  | C | -8.081  | -12.514 | 3.079  |
| H   | -6.796  | -4.452  | 0.424  | H | -7.904  | -13.449 | 3.588  |
| H   | -4.944  | -6.306  | 0.290  | C | -9.152  | -3.125  | -3.263 |
| H   | -3.185  | -4.916  | 1.383  | H | -9.981  | -2.455  | -3.508 |
| O   | -9.010  | -8.095  | 0.643  | H | -9.426  | -4.144  | -3.556 |
| O   | -7.464  | -6.301  | 0.941  | C | -8.890  | -3.156  | -1.751 |
| O   | -8.898  | -10.122 | -1.062 | H | -8.078  | -3.842  | -1.507 |
| H   | -8.342  | -9.328  | -1.096 | H | -8.621  | -2.160  | -1.371 |
| H   | -8.485  | -10.773 | -1.662 | C | -10.155 | -3.572  | -1.004 |
| O   | -4.726  | -8.687  | -1.220 | O | -11.217 | -2.963  | -1.237 |
| H   | -3.849  | -9.099  | -1.253 | O | -10.090 | -4.494  | -0.108 |
| H   | -5.118  | -8.878  | -2.099 | C | -9.444  | -8.942  | -4.262 |
| O   | -6.089  | -9.014  | 0.994  | H | -8.630  | -9.563  | -3.880 |
| H   | -5.292  | -8.929  | 1.605  | H | -9.542  | -9.182  | -5.324 |
| H   | -5.755  | -8.892  | 0.067  | C | -9.060  | -7.455  | -4.069 |
|     |         |         |        | H | -8.294  | -7.212  | -4.815 |
| IM4 |         |         |        | H | -9.905  | -6.787  | -4.243 |
| C   | -5.299  | -7.104  | 5.936  | C | -8.434  | -7.182  | -2.684 |
| H   | -4.878  | -7.600  | 6.817  | O | -7.385  | -7.777  | -2.390 |
| H   | -6.258  | -7.572  | 5.700  | O | -9.070  | -6.355  | -1.921 |
| C   | -4.329  | -7.282  | 4.745  | C | -14.837 | -6.572  | -0.106 |
| H   | -3.905  | -6.336  | 4.381  | H | -14.898 | -5.589  | 0.369  |
| H   | -3.464  | -7.882  | 5.037  | H | -15.457 | -7.266  | 0.474  |
| C   | -4.943  | -7.941  | 3.513  | N | -12.993 | -8.348  | 0.043  |
| O   | -6.199  | -7.745  | 3.322  | H | -13.597 | -9.165  | 0.234  |
| O   | -4.191  | -8.609  | 2.764  | C | -13.419 | -7.035  | -0.123 |
| C   | -10.393 | -7.047  | 5.690  | C | -11.636 | -8.339  | 0.054  |
| H   | -11.191 | -6.754  | 6.381  | H | -11.019 | -9.220  | 0.129  |

|     |         |         |        |   |         |         |        |
|-----|---------|---------|--------|---|---------|---------|--------|
| N   | -11.180 | -7.099  | -0.096 | H | -9.545  | -6.639  | 6.242  |
| C   | -12.281 | -6.287  | -0.222 | C | -10.855 | -6.289  | 4.546  |
| H   | -12.180 | -5.223  | -0.344 | H | -11.876 | -6.517  | 4.224  |
| Fe  | -7.553  | -8.399  | 1.921  | H | -10.863 | -5.208  | 4.742  |
| Fe  | -9.238  | -6.236  | 0.076  | C | -9.977  | -6.489  | 3.309  |
| C   | -4.427  | -3.395  | 2.649  | O | -8.944  | -7.234  | 3.410  |
| C   | -5.814  | -3.526  | 3.082  | O | -10.349 | -5.891  | 2.269  |
| C   | -6.781  | -4.178  | 2.378  | C | -6.755  | -10.625 | 4.440  |
| C   | -6.476  | -4.767  | 1.089  | H | -7.171  | -9.711  | 4.872  |
| C   | -5.052  | -4.657  | 0.587  | H | -5.758  | -10.382 | 4.058  |
| C   | -4.080  | -3.936  | 1.461  | N | -8.952  | -12.314 | 2.009  |
| C   | -3.450  | -2.679  | 3.549  | H | -9.412  | -13.125 | 1.553  |
| H   | -3.212  | -3.284  | 4.432  | C | -7.661  | -11.132 | 3.355  |
| H   | -3.863  | -1.731  | 3.911  | C | -9.045  | -11.012 | 1.675  |
| H   | -2.507  | -2.477  | 3.032  | H | -9.552  | -10.652 | 0.793  |
| H   | -6.082  | -3.063  | 4.031  | N | -8.268  | -10.263 | 2.461  |
| H   | -7.797  | -4.255  | 2.744  | C | -8.077  | -12.410 | 3.065  |
| H   | -5.076  | -4.203  | -0.416 | H | -7.836  | -13.364 | 3.509  |
| H   | -4.703  | -5.686  | 0.405  | C | -9.170  | -3.120  | -3.259 |
| H   | -3.056  | -3.859  | 1.100  | H | -9.998  | -2.451  | -3.512 |
| O   | -8.547  | -7.814  | 0.536  | H | -9.444  | -4.138  | -3.553 |
| O   | -7.311  | -5.350  | 0.374  | C | -8.921  | -3.150  | -1.745 |
| O   | -8.824  | -9.993  | -1.077 | H | -8.099  | -3.824  | -1.494 |
| H   | -8.263  | -9.200  | -1.085 | H | -8.660  | -2.153  | -1.361 |
| H   | -8.406  | -10.644 | -1.674 | C | -10.171 | -3.590  | -0.983 |
| O   | -4.748  | -8.813  | -1.400 | O | -11.269 | -3.069  | -1.265 |
| H   | -3.852  | -9.176  | -1.465 | O | -10.022 | -4.420  | -0.009 |
| H   | -5.157  | -8.977  | -2.275 | C | -9.417  | -8.954  | -4.210 |
| O   | -5.907  | -8.908  | 0.899  | H | -8.640  | -9.624  | -3.830 |
| H   | -5.110  | -8.872  | 1.514  | H | -9.494  | -9.143  | -5.285 |
| H   | -5.601  | -8.859  | -0.053 | C | -8.982  | -7.495  | -3.938 |
|     |         |         |        | H | -8.135  | -7.272  | -4.600 |
| TS5 |         |         |        | H | -9.771  | -6.780  | -4.182 |
| C   | -5.316  | -7.177  | 6.023  | C | -8.510  | -7.260  | -2.489 |
| H   | -4.835  | -7.601  | 6.912  | O | -7.584  | -8.002  | -2.055 |
| H   | -6.283  | -7.673  | 5.890  | O | -9.095  | -6.352  | -1.824 |
| C   | -4.429  | -7.493  | 4.805  | C | -15.030 | -6.457  | -0.128 |
| H   | -3.503  | -6.917  | 4.792  | H | -15.121 | -5.462  | 0.318  |
| H   | -4.139  | -8.549  | 4.892  | H | -15.667 | -7.147  | 0.436  |
| C   | -5.104  | -7.335  | 3.439  | N | -13.191 | -8.219  | 0.085  |
| O   | -6.269  | -7.797  | 3.292  | H | -13.786 | -9.037  | 0.315  |
| O   | -4.416  | -6.751  | 2.541  | C | -13.612 | -6.907  | -0.107 |
| C   | -10.490 | -7.019  | 5.847  | C | -11.842 | -8.224  | 0.050  |
| H   | -11.275 | -6.815  | 6.584  | H | -11.221 | -9.096  | 0.161  |

|     |         |         |        |   |         |         |        |
|-----|---------|---------|--------|---|---------|---------|--------|
| N   | -11.388 | -6.991  | -0.161 | H | -9.555  | -6.633  | 6.208  |
| C   | -12.477 | -6.168  | -0.277 | C | -10.882 | -6.297  | 4.520  |
| H   | -12.361 | -5.111  | -0.442 | H | -11.915 | -6.502  | 4.225  |
| Fe  | -7.863  | -8.147  | 1.970  | H | -10.857 | -5.214  | 4.702  |
| Fe  | -9.529  | -6.304  | 0.247  | C | -10.042 | -6.525  | 3.261  |
| C   | -5.005  | -3.255  | 2.681  | O | -9.018  | -7.300  | 3.361  |
| C   | -6.335  | -3.389  | 3.165  | O | -10.401 | -5.939  | 2.220  |
| C   | -7.267  | -4.249  | 2.612  | C | -6.784  | -10.603 | 4.430  |
| C   | -6.910  | -5.073  | 1.514  | H | -7.218  | -9.701  | 4.871  |
| C   | -5.549  | -4.994  | 1.041  | H | -5.782  | -10.345 | 4.070  |
| C   | -4.668  | -3.990  | 1.564  | N | -8.897  | -12.274 | 1.910  |
| C   | -4.010  | -2.387  | 3.411  | H | -9.370  | -13.083 | 1.468  |
| H   | -3.647  | -2.894  | 4.314  | C | -7.652  | -11.102 | 3.309  |
| H   | -4.450  | -1.439  | 3.732  | C | -8.883  | -10.987 | 1.507  |
| H   | -3.132  | -2.180  | 2.792  | H | -9.293  | -10.620 | 0.575  |
| H   | -6.628  | -2.780  | 4.018  | N | -8.132  | -10.243 | 2.327  |
| H   | -8.277  | -4.299  | 2.998  | C | -8.119  | -12.365 | 3.040  |
| H   | -5.368  | -5.393  | 0.048  | H | -7.971  | -13.311 | 3.538  |
| H   | -5.057  | -5.961  | 1.724  | C | -9.166  | -3.119  | -3.265 |
| H   | -3.674  | -3.906  | 1.129  | H | -10.001 | -2.466  | -3.537 |
| O   | -9.155  | -7.991  | 0.694  | H | -9.425  | -4.147  | -3.540 |
| O   | -7.691  | -5.991  | 1.011  | C | -8.927  | -3.111  | -1.750 |
| O   | -9.070  | -10.208 | -1.003 | H | -8.085  | -3.749  | -1.475 |
| H   | -8.560  | -9.388  | -1.057 | H | -8.706  | -2.099  | -1.383 |
| H   | -8.616  | -10.837 | -1.598 | C | -10.172 | -3.578  | -0.998 |
| O   | -4.483  | -8.611  | -0.976 | O | -11.273 | -3.055  | -1.267 |
| H   | -3.548  | -8.854  | -1.049 | O | -10.027 | -4.438  | -0.049 |
| H   | -4.873  | -8.901  | -1.831 | C | -9.437  | -8.950  | -4.260 |
| O   | -6.603  | -8.594  | 0.417  | H | -8.629  | -9.576  | -3.870 |
| H   | -7.013  | -8.225  | -0.407 | H | -9.532  | -9.202  | -5.320 |
| H   | -5.639  | -8.638  | 0.198  | C | -9.040  | -7.464  | -4.089 |
|     |         |         |        | H | -8.247  | -7.253  | -4.818 |
| IM5 |         |         |        | H | -9.871  | -6.794  | -4.315 |
| C   | -5.260  | -7.118  | 5.930  | C | -8.472  | -7.140  | -2.691 |
| H   | -4.748  | -7.575  | 6.783  | O | -7.395  | -7.691  | -2.351 |
| H   | -6.206  | -7.643  | 5.773  | O | -9.152  | -6.340  | -1.962 |
| C   | -4.376  | -7.269  | 4.678  | C | -14.997 | -6.473  | -0.125 |
| H   | -3.660  | -6.456  | 4.525  | H | -15.080 | -5.480  | 0.326  |
| H   | -3.751  | -8.166  | 4.790  | H | -15.628 | -7.164  | 0.445  |
| C   | -5.130  | -7.467  | 3.379  | N | -13.155 | -8.236  | 0.067  |
| O   | -6.335  | -7.758  | 3.357  | H | -13.749 | -9.052  | 0.300  |
| O   | -4.388  | -7.370  | 2.307  | C | -13.579 | -6.924  | -0.122 |
| C   | -10.502 | -7.019  | 5.824  | C | -11.805 | -8.239  | 0.011  |
| H   | -11.280 | -6.807  | 6.567  | H | -11.182 | -9.110  | 0.124  |

|     |         |         |        |   |         |         |        |
|-----|---------|---------|--------|---|---------|---------|--------|
| N   | -11.355 | -7.007  | -0.209 | H | -9.497  | -6.664  | 6.142  |
| C   | -12.446 | -6.185  | -0.307 | C | -10.799 | -6.363  | 4.427  |
| H   | -12.334 | -5.126  | -0.470 | H | -11.799 | -6.643  | 4.077  |
| Fe  | -7.927  | -8.083  | 1.917  | H | -10.858 | -5.281  | 4.593  |
| Fe  | -9.479  | -6.314  | 0.100  | C | -9.871  | -6.547  | 3.220  |
| C   | -5.115  | -3.218  | 2.633  | O | -8.894  | -7.377  | 3.330  |
| C   | -6.291  | -3.595  | 3.301  | O | -10.128 | -5.870  | 2.203  |
| C   | -7.213  | -4.467  | 2.729  | C | -6.748  | -10.680 | 4.404  |
| C   | -6.986  | -4.988  | 1.442  | H | -7.166  | -9.756  | 4.808  |
| C   | -5.886  | -4.508  | 0.713  | H | -5.742  | -10.451 | 4.038  |
| C   | -4.958  | -3.655  | 1.312  | N | -8.867  | -12.400 | 1.920  |
| C   | -4.054  | -2.421  | 3.354  | H | -9.350  | -13.217 | 1.488  |
| H   | -3.615  | -3.007  | 4.172  | C | -7.617  | -11.208 | 3.299  |
| H   | -4.460  | -1.508  | 3.800  | C | -8.838  | -11.130 | 1.481  |
| H   | -3.230  | -2.147  | 2.689  | H | -9.243  | -10.774 | 0.542  |
| H   | -6.470  | -3.216  | 4.306  | N | -8.086  | -10.374 | 2.290  |
| H   | -8.091  | -4.776  | 3.282  | C | -8.097  | -12.471 | 3.058  |
| H   | -5.744  | -4.833  | -0.312 | H | -7.954  | -13.406 | 3.576  |
| H   | -4.978  | -7.556  | 1.493  | C | -9.159  | -3.128  | -3.280 |
| H   | -4.085  | -3.352  | 0.740  | H | -9.986  | -2.457  | -3.534 |
| O   | -9.066  | -8.023  | 0.545  | H | -9.432  | -4.146  | -3.575 |
| O   | -7.712  | -6.030  | 0.949  | C | -8.915  | -3.158  | -1.768 |
| O   | -8.691  | -10.003 | -1.159 | H | -8.106  | -3.844  | -1.507 |
| H   | -8.161  | -9.205  | -1.316 | H | -8.644  | -2.166  | -1.381 |
| H   | -8.341  | -10.697 | -1.753 | C | -10.183 | -3.572  | -1.031 |
| O   | -4.779  | -8.990  | -1.506 | O | -11.257 | -2.996  | -1.291 |
| H   | -3.835  | -9.188  | -1.590 | O | -10.101 | -4.456  | -0.093 |
| H   | -5.162  | -9.071  | -2.406 | C | -9.446  | -8.968  | -4.294 |
| O   | -6.062  | -8.018  | 0.470  | H | -8.631  | -9.578  | -3.897 |
| H   | -6.512  | -7.265  | 0.031  | H | -9.550  | -9.245  | -5.346 |
| H   | -5.634  | -8.538  | -0.281 | C | -9.057  | -7.477  | -4.154 |
| TS6 |         |         |        | H | -8.245  | -7.282  | -4.864 |
| C   | -5.227  | -7.155  | 6.020  | H | -9.884  | -6.813  | -4.415 |
| H   | -4.697  | -7.553  | 6.892  | C | -8.529  | -7.148  | -2.743 |
| H   | -6.161  | -7.710  | 5.900  | O | -7.474  | -7.710  | -2.372 |
| C   | -4.352  | -7.363  | 4.773  | O | -9.239  | -6.356  | -2.030 |
| H   | -3.595  | -6.591  | 4.617  | C | -14.923 | -6.520  | -0.115 |
| H   | -3.782  | -8.294  | 4.900  | H | -15.001 | -5.533  | 0.350  |
| C   | -5.118  | -7.534  | 3.477  | H | -15.546 | -7.217  | 0.458  |
| O   | -6.308  | -7.914  | 3.482  | N | -13.065 | -8.275  | 0.060  |
| O   | -4.434  | -7.318  | 2.398  | H | -13.659 | -9.097  | 0.269  |
| C   | -10.448 | -7.044  | 5.762  | C | -13.502 | -6.967  | -0.121 |
| H   | -11.229 | -6.795  | 6.490  | C | -11.712 | -8.261  | 0.037  |
|     |         |         |        | H | -11.083 | -9.130  | 0.134  |

|     |         |         |        |   |         |         |        |
|-----|---------|---------|--------|---|---------|---------|--------|
| N   | -11.273 | -7.020  | -0.151 | H | -9.368  | -6.702  | 5.990  |
| C   | -12.374 | -6.212  | -0.266 | C | -10.585 | -6.440  | 4.201  |
| H   | -12.275 | -5.151  | -0.409 | H | -11.580 | -6.711  | 3.823  |
| Fe  | -7.805  | -8.299  | 1.953  | H | -10.608 | -5.349  | 4.301  |
| Fe  | -9.389  | -6.259  | 0.047  | C | -9.609  | -6.749  | 3.056  |
| C   | -5.016  | -3.159  | 2.642  | O | -8.859  | -7.755  | 3.161  |
| C   | -6.293  | -3.493  | 3.117  | O | -9.658  | -5.966  | 2.049  |
| C   | -7.175  | -4.274  | 2.367  | C | -6.709  | -10.721 | 4.386  |
| C   | -6.796  | -4.721  | 1.094  | H | -7.138  | -9.787  | 4.759  |
| C   | -5.576  | -4.297  | 0.558  | H | -5.700  | -10.509 | 4.017  |
| C   | -4.693  | -3.553  | 1.338  | N | -8.834  | -12.538 | 1.981  |
| C   | -4.018  | -2.436  | 3.517  | H | -9.324  | -13.358 | 1.556  |
| H   | -3.615  | -3.101  | 4.292  | C | -7.580  | -11.296 | 3.305  |
| H   | -4.467  | -1.578  | 4.028  | C | -8.839  | -11.280 | 1.515  |
| H   | -3.162  | -2.079  | 2.935  | H | -9.285  | -10.957 | 0.583  |
| H   | -6.596  | -3.158  | 4.107  | N | -8.085  | -10.499 | 2.289  |
| H   | -8.144  | -4.548  | 2.763  | C | -8.040  | -12.575 | 3.100  |
| H   | -5.311  | -4.570  | -0.457 | H | -7.864  | -13.496 | 3.632  |
| H   | -5.110  | -7.447  | 1.577  | C | -9.173  | -3.115  | -3.270 |
| H   | -3.722  | -3.300  | 0.920  | H | -10.007 | -2.463  | -3.546 |
| O   | -8.894  | -7.902  | 0.581  | H | -9.433  | -4.141  | -3.552 |
| O   | -7.500  | -5.687  | 0.404  | C | -8.933  | -3.109  | -1.754 |
| O   | -8.697  | -9.979  | -1.121 | H | -8.065  | -3.711  | -1.481 |
| H   | -8.193  | -9.165  | -1.298 | H | -8.760  | -2.089  | -1.383 |
| H   | -8.341  | -10.663 | -1.722 | C | -10.158 | -3.638  | -1.014 |
| O   | -4.881  | -8.880  | -1.225 | O | -11.280 | -3.165  | -1.267 |
| H   | -3.916  | -8.909  | -1.288 | O | -9.976  | -4.507  | -0.065 |
| H   | -5.202  | -9.010  | -2.143 | C | -9.401  | -8.935  | -4.183 |
| O   | -6.194  | -7.676  | 0.717  | H | -8.611  | -9.560  | -3.758 |
| H   | -6.796  | -6.684  | 0.412  | H | -9.451  | -9.193  | -5.245 |
| H   | -5.857  | -8.145  | -0.097 | C | -9.003  | -7.444  | -4.036 |
|     |         |         |        | H | -8.223  | -7.244  | -4.778 |
| P-H |         |         |        | H | -9.847  | -6.789  | -4.267 |
| C   | -5.422  | -7.005  | 5.806  | C | -8.415  | -7.029  | -2.669 |
| H   | -5.056  | -7.621  | 6.634  | O | -7.206  | -7.217  | -2.428 |
| H   | -6.404  | -7.377  | 5.501  | O | -9.244  | -6.450  | -1.865 |
| C   | -4.441  | -7.095  | 4.617  | C | -14.908 | -6.543  | -0.101 |
| H   | -4.244  | -6.119  | 4.154  | H | -14.955 | -5.550  | 0.355  |
| H   | -3.470  | -7.492  | 4.921  | H | -15.563 | -7.209  | 0.473  |
| C   | -4.968  | -7.932  | 3.463  | N | -13.129 | -8.377  | 0.071  |
| O   | -6.231  | -7.812  | 3.227  | H | -13.751 | -9.182  | 0.276  |
| O   | -4.178  | -8.644  | 2.802  | C | -13.506 | -7.049  | -0.082 |
| C   | -10.324 | -7.055  | 5.597  | C | -11.774 | -8.417  | 0.087  |
| H   | -11.111 | -6.705  | 6.275  | H | -11.195 | -9.325  | 0.152  |

|    |         |         |        |
|----|---------|---------|--------|
| N  | -11.271 | -7.195  | -0.050 |
| C  | -12.341 | -6.342  | -0.170 |
| H  | -12.201 | -5.282  | -0.295 |
| Fe | -7.492  | -8.518  | 1.843  |
| Fe | -9.280  | -6.301  | 0.092  |
| C  | -4.212  | -3.739  | 2.420  |
| C  | -5.486  | -3.177  | 2.249  |
| C  | -6.428  | -3.747  | 1.393  |
| C  | -6.110  | -4.913  | 0.692  |
| C  | -4.864  | -5.520  | 0.879  |
| C  | -3.926  | -4.921  | 1.721  |
| C  | -3.178  | -3.090  | 3.315  |
| H  | -2.758  | -3.803  | 4.035  |
| H  | -3.607  | -2.258  | 3.881  |
| H  | -2.334  | -2.698  | 2.734  |
| H  | -5.742  | -2.269  | 2.790  |
| H  | -7.406  | -3.297  | 1.261  |
| H  | -4.628  | -6.449  | 0.369  |
| H  | -5.037  | -9.026  | 1.554  |
| H  | -2.951  | -5.391  | 1.836  |
| O  | -8.352  | -7.830  | 0.414  |
| O  | -7.062  | -5.418  | -0.175 |
| O  | -8.953  | -9.987  | -1.035 |
| H  | -8.473  | -9.180  | -0.766 |
| H  | -8.381  | -10.549 | -1.589 |
| O  | -4.725  | -8.751  | -1.389 |
| H  | -3.818  | -9.079  | -1.494 |
| H  | -5.140  | -8.847  | -2.274 |
| O  | -5.811  | -9.119  | 0.914  |
| H  | -6.736  | -6.118  | -0.784 |
| H  | -5.494  | -8.999  | -0.027 |
